# Supplementary material
Source: publisher site journal article supplement (https://www.dovepress.com/article/343826)

# Supplementary Tables

**Supplementary Table 1** RNA quantification and quality assurance as measured using NanoDrop ND-1000

| **Sample ID** | **OD260/280 Ratio** | **OD260/230 Ratio** | **Conc. (ng/μl)** | **Volume** | **Quantity (ng)** | **QC Purity Pass or Fail** |
| --- | --- | --- | --- | --- | --- | --- |
| 26 | 2.00 | 2.22 | 777.84 | 10 | 7778.40 | pass |
| 28 | 1.99 | 2.23 | 573.80 | 10 | 57380 | pass |
| 29 | 1.91 | 2.08 | 444.08 | 10 | 4440.80 | pass |
| 231 | 1.99 | 2.20 | 1013.15 | 10 | 10131.50 | pass |
| 232 | 1.97 | 2.16 | 699.57 | 10 | 6995.70 | pass |
| 182 | 1.99 | 2.09 | 835.21 | 10 | 8352.10 | pass |
| 218 | 1.98 | 2.19 | 501.07 | 10 | 5010.70 | pass |
| 221 | 1.91 | 2.29 | 432.26 | 10 | 4322.60 | pass |
| 252 | 1.89 | 2.31 | 474.93 | 10 | 4749.30 | pass |
| 32 | 1.90 | 2.11 | 420.48 | 10 | 4204.80 | pass |

**Note**: Pure RNA is indicated by an OD A260/A280 ratio of between 1.8 and 2.1. The OD 260/A230 ratio should be greater than 1.8. Samples 26, 28, 29, 231, and 232 were from healthy control individuals, and 182, 218, 221, 252, and 32 were from those with CSU.

**Abbreviations**: OD, optical density; Conc, concentration; QC, quality control.

**Supplementary Table 2** Signaling pathways associated with differentially expressed downregulated mRNAs

| **Pathway** | **Fisher *p*** | **Count** | **Genes** |
| --- | --- | --- | --- |
| Salmonella infection - *Homo sapiens* (human) | 0.002581652 | 4 | CCL3L3//CCL4//IL1A//WASL |
| Tight junction - *Homo sapiens* (human) | 0.005483352 | 5 | MPP4//NEDD4//OCLN//PRKAG3//WASL |
| Cytokine–cytokine receptor interaction - *Homo sapiens* (human) | 0.01348469 | 6 | BMPR1B//CCL3L3//CCL4//IL1A//IL22//INHBA |
| TGFβ signaling pathway - *Homo sapiens* (human) | 0.01872014 | 3 | BMPR1B//FST//INHBA |

**Abbreviations**: TGFβ, transforming growth factor β.

**Supplementary Table 3** The top 5 up- and downregulated lncRNAs co-expressed with VEFG signaling pathway

| **lncRNA Seqname** | **Up-/downregulated** | **mRNA Seqname** | **mRNA GeneSymbol** | **PCC** | ***p*** |
| --- | --- | --- | --- | --- | --- |
| NR_002730 | up | NM_005417 | SRC | 0.99347 | 7.89E-09 |
| ENST00000570060 | up | NM_005026 | PIK3CD | 0.987211 | 1.15E-07 |
| T331129 | up | NM_004322 | BAD | 0.986628 | 1.38E-07 |
| T109873 | up | NM_024420 | PLA2G4A | 0.968633 | 4.08E-06 |
| NR_001459 | up | NM_000944 | PPP3CA | 0.94822 | 2.95E-05 |
| T084828 | down | NM_005417 | SRC | -0.98488 | 2.25E-07 |
| ENST00000540547 | down | NM_004322 | BAD | -0.97139 | 2.83E-06 |
| T091075 | down | NM_024420 | PLA2G4A | -0.97133 | 2.86E-06 |
| TCONS_00000953 | down | NM_005026 | PIK3CD | -0.9657 | 5.81E-06 |
| T239728 | down | NM_000944 | PPP3CA | -0.95547 | 1.63E-05 |

**Note**: A Pearson correlation analyses was used.

**Abbreviations**: PCC, Pearson Correlation Coefficient.

**Supplementary Table 4** lncRNA primer sequence for polymerase chain reaction

| **lncRNA** | **Primer Squence(5’-3’)** |
| --- | --- |
| ENST417930 | F： ACGCGGTTCTCGTCAAAGTT |
|  | R： GCAGTGCCCTGGATTCGTATA |
| ENST562459 | F： GGCTGACACTTGAGGATTGCT |
|  | R： CCGGCCTCTTACAGTCTGAGAA |
| ENST587970 | F： TATTCCCTGTTGCTAAGCCG |
|  | R： GGCTTGGGACATTTCACTCT |
| his-1_RNA_dna | F： TCTGCCAGTTTGAGCACATT |
|  | R： TGGAGGCTACCCAAGCTATT |
| T224062 | F： CCAGCACCGCTGTTATAGTT |
|  | R： CCTCCTTGACAGTCCCCTTA |
| T264761 | F： GCATCCTTAGCTGTGGAACA |
|  | R： ATGCTTGCCAGTGCTCTATC |
| T280622 | F： AAGTCAAAGGGCAAGATTGGG |
|  | R： CACACCTAAACACACAAAGGAA |
| β-actin | F： GCATGGGTCAGAAGGATTCCT |
|  | R： TCGTCCCAGTTGGTGACGAT |

**Supplementary Table 5** Expression levels of seven lncRNAs in CSU and Control group

| **lncRNA** | **CSU Group** | **Control Group** | **Z** | ***p*** |
| --- | --- | --- | --- | --- |
| ENST00000417930 | 0.507 (0.028–3.909) | 1.043 (0.487–1.840) | –3.463 | 0.001* |
| ENST00000562459 | 0.814 (0.039–9.906) | 0.302 (0.012–2.498) | –2.127 | 0.033* |
| ENST00000587970 | 1.701 (0.224–29.378) | 0.637 (0.046–13.907) | –2.424 | 0.015* |
| his-1_RNA_dna | 0.600 (0.067–8.417) | 0.436 (0.055–2.466) | –2.022 | 0.043* |
| T224062 | 0.616 (0.087–9.966) | 1.000 (0.247–17.967) | –1.614 | 0.106 |
| T264761 | 3.992 (0.061–27.864) | 2.458 (0.481–11.366) | –2.177 | 0.029* |
| T280622 | 0.376 (0.013–5.612) | 0.124 (0.027–1.682) | –2.035 | 0.042* |

**Note**: CSU group was n = 53 and Control group was n = 20. Data are shown as median (range). A Mann-Whitney U test was used to compare groups. *** Represents *p* < 0.05 in the CSU vs the Control group.

**Supplementary Table 6** The concentration of inflammatory mediators in serum in the CSU and Control group (ng/mL)

| **Mediator** | **CSU Group** | **Control Group** | **Z** | ***p*** |
| --- | --- | --- | --- | --- |
| Hs-CRP | 502.600 (243.991–14050.492) | 354.470 (234.503–4002.281) | –1.028 | 0.304 |
| LTB4 | 1.480 (1.003–3.795) | 1.382 (1.050–2.089) | –1.297 | 0.195 |
| PGD2 | 10.346 (0.690–38.572) | 8.336 (1.676–24.516) | –0.867 | 0.386 |
| MCT | 8.490 (1.013–23.476) | 7.881 (4.732–12.246) | –0.744 | 0.457 |
| D-dimer | 83.075 (19.902–237.727) | 55.989 (39.752–115.929) | –2.003 | 0.045* |
| HIS | 0.126 (0.017–0.577) | 0.064 (0.020–0.525) | –2.087 | 0.037* |

**Note:** CSU group was n=56 and Control group was n=13. Data are shown as median (range). A Mann-Whitney U test was used to compare groups. *** Represents *p* < 0.05 in the CSU vs the Control group.

**Abbreviations**: hs-CRP, high sensitivity C-reactive protein; LTB4, leukotriene B4; PGD2, prostaglandin D2; MCT, mast cell tryptase; HIS, histamine.

**Supplementary Table 7** Correlations between lncRNAs levels and clinical characteristics and inflammatory mediators

|  |  | **lncRNA** | | | | | |
| --- | --- | --- | --- | --- | --- | --- | --- |
|  | **Spearman Analysis** | **ENST00000417930** | **ENST00000562459** | **ENST00000587970** | **his-1_RNA_dna** | **T264761** | **T280622** |
| Age | r | –0.012 | 0.121 | –0.162 | –0.047 | -0.045 | -0.140 |
|  | *p* | 0.935 | 0.387 | 0.245 | 0.736 | 0.747 | 0.316 |
| Duration | r | 0.122 | –0.059 | -0.007 | 0.115 | 0.069 | -0.241 |
|  | *p* | 0.384 | 0.675 | 0.962 | 0.410 | 0.623 | 0.082 |
| Frequencies | r | 0.007 | –0.187 | –0.188 | 0.303 | 0.083 | -0.136 |
|  | *p* | 0.959 | 0.181 | 0.178 | **0.027*** | 0.556 | 0.333 |
| Shortest duration time | r | 0.221 | 0.059 | 0.203 | –0.109 | -0.057 | 0.036 |
|  | *p* | 0.112 | 0.675 | 0.146 | 0.439 | 0.684 | 0.798 |
| Longest duration time | r | 0.136 | 0.008 | 0.148 | –0.244 | 0.065 | -0.039 |
|  | *p* | 0.331 | 0.953 | 0.291 | 0.079 | 0.644 | 0.782 |
| Minimum wheal diameter | r | 0.132 | 0.024 | 0.143 | 0.025 | –0.191 | –0.002 |
|  | *p* | 0.348 | 0.865 | 0.307 | 0.857 | 0.170 | 0.990 |
| Maximum wheal diameter | r | –0.276 | –0.079 | 0.001 | –0.291 | –0.352 | –0.271 |
|  | *p* | **0.045*** | 0.574 | 0.995 | **0.034*** | **0.010*** | **0.049*** |
| Urticaria activity score 7 | r | –0.033 | 0.044 | –0.066 | 0.122 | 0.054 | –0.094 |
|  | *p* | 0.813 | 0.753 | 0.637 | 0.386 | 0.703 | 0.504 |
| D-dimer | r | 0.027 | 0.000 | –0.003 | 0.140 | –0.259 | 0.119 |
|  | *p* | 0.853 | 0.999 | 0.981 | 0.328 | 0.066 | 0.406 |
| Histamine | r | 0.074 | 0.152 | 0.192 | 0.217 | 0.058 | –0.054 |
|  | *p* | 0.608 | 0.228 | 0.176 | 0.127 | 0.687 | 0.706 |

**Note:** * Represents p<0.05.

**Supplementary Table 8** The ROC curves of selected lncRNAs to assess predictive value in CSU risk

| **lncRNA** | **AUC** | ***p*** | **Cut-Off Value** | **Sensitivity (%)** | **Specificity (%)** |
| --- | --- | --- | --- | --- | --- |
| ENST00000417930 | 0.236 | 0.001 | - | - | - |
| ENST00000562459 | 0.662 | 0.033 | 0.116 | 92.50 | 40 |
| ENST00000587970 | 0.685 | 0.015 | 0.665 | 81.13 | 55 |
| his-1_RNA_dna | 0.654 | 0.043 | 0.355 | 83.02 | 45 |
| T264761 | 0.666 | 0.029 | 4.138 | 49.06 | 90 |
| T280622 | 0.655 | 0.042 | 0.178 | 79.25 | 60 |

**Abbreviations:** AUC, area under ROC curve.

# Supplementary Figures

**Supplementary Figure 1** RNA integrity assessment and gDNA contamination test by denaturing agarose gel electrophoresis. The 28S and 18S rRNA bands are clear and intact, with the 28S band twice as intense as the 18S band. Lanes 1, 2, 3, 4, and 5 contained the total RNA of samples 26, 28, 29, 231, and 232, respectively. Lanes 6, 7, 8, 9, and 10 contained the total RNA of samples 182, 218, 221, 252, and 32 respectively.


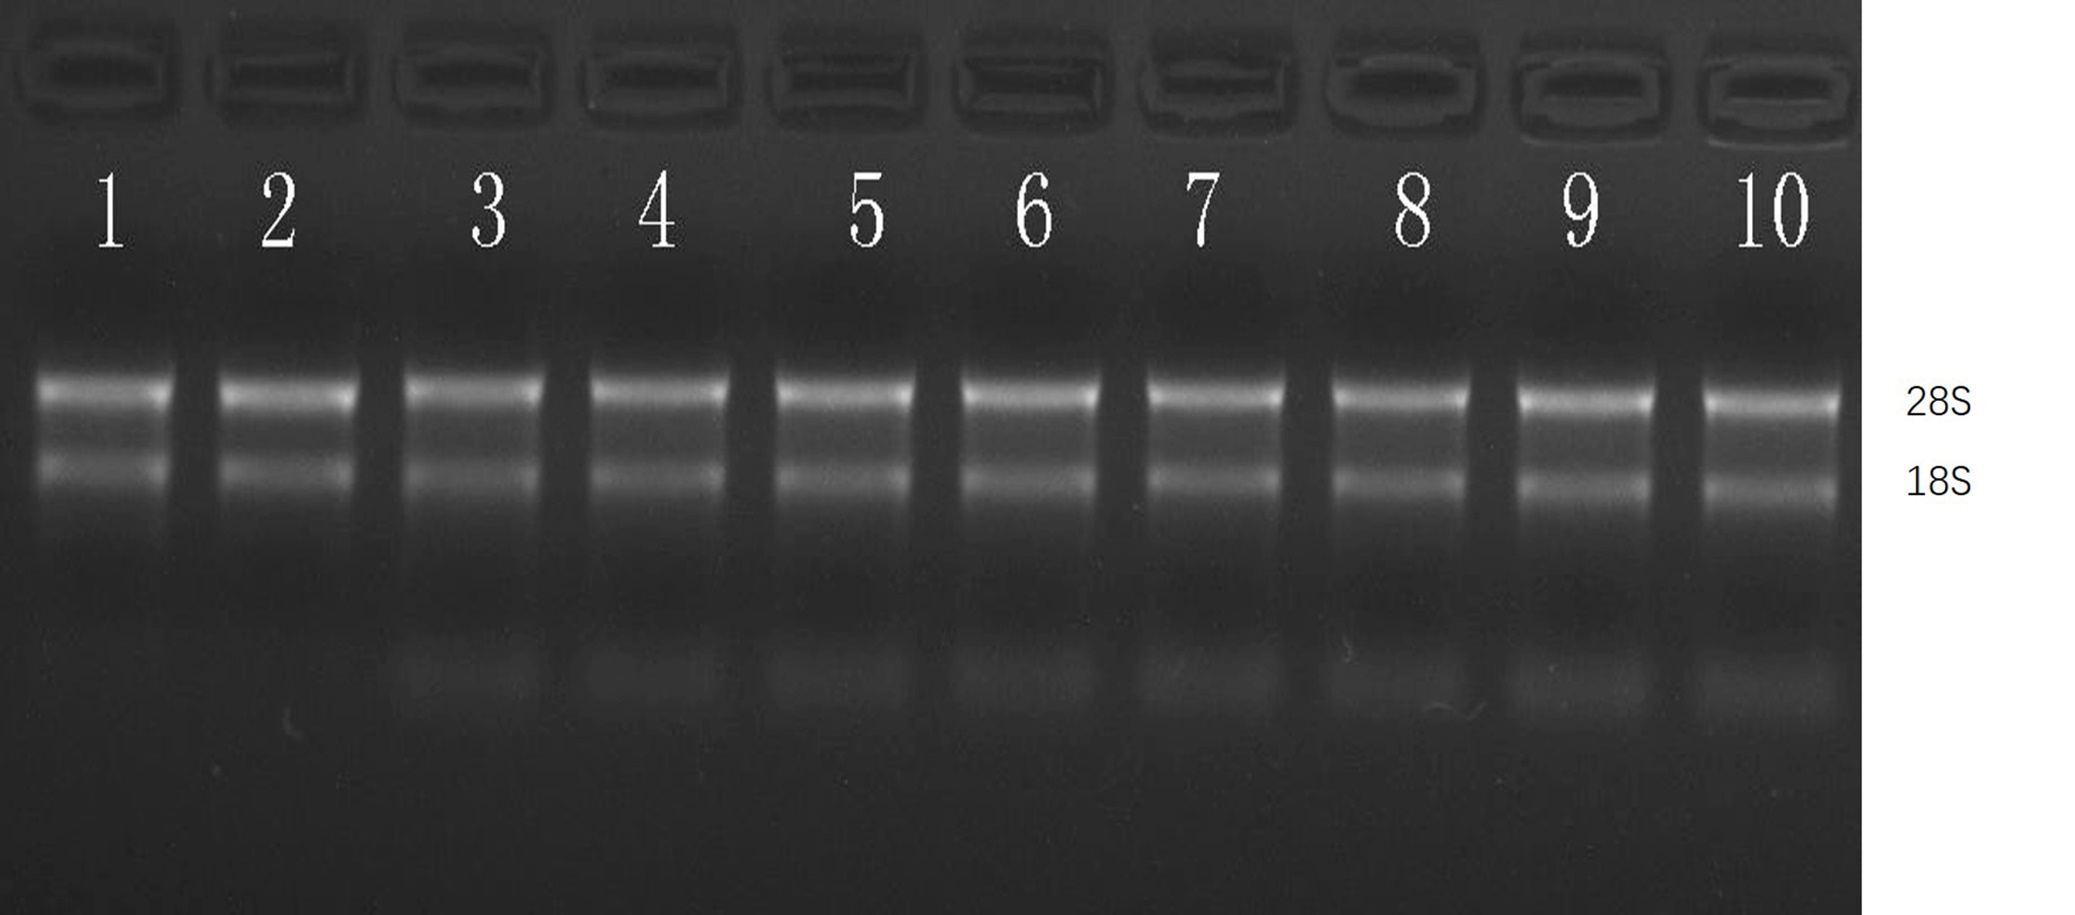


**Supplementary Figure 2** KEGG enrichment analysis of upregulated mRNAs, showing the top 10 enrichment scores.


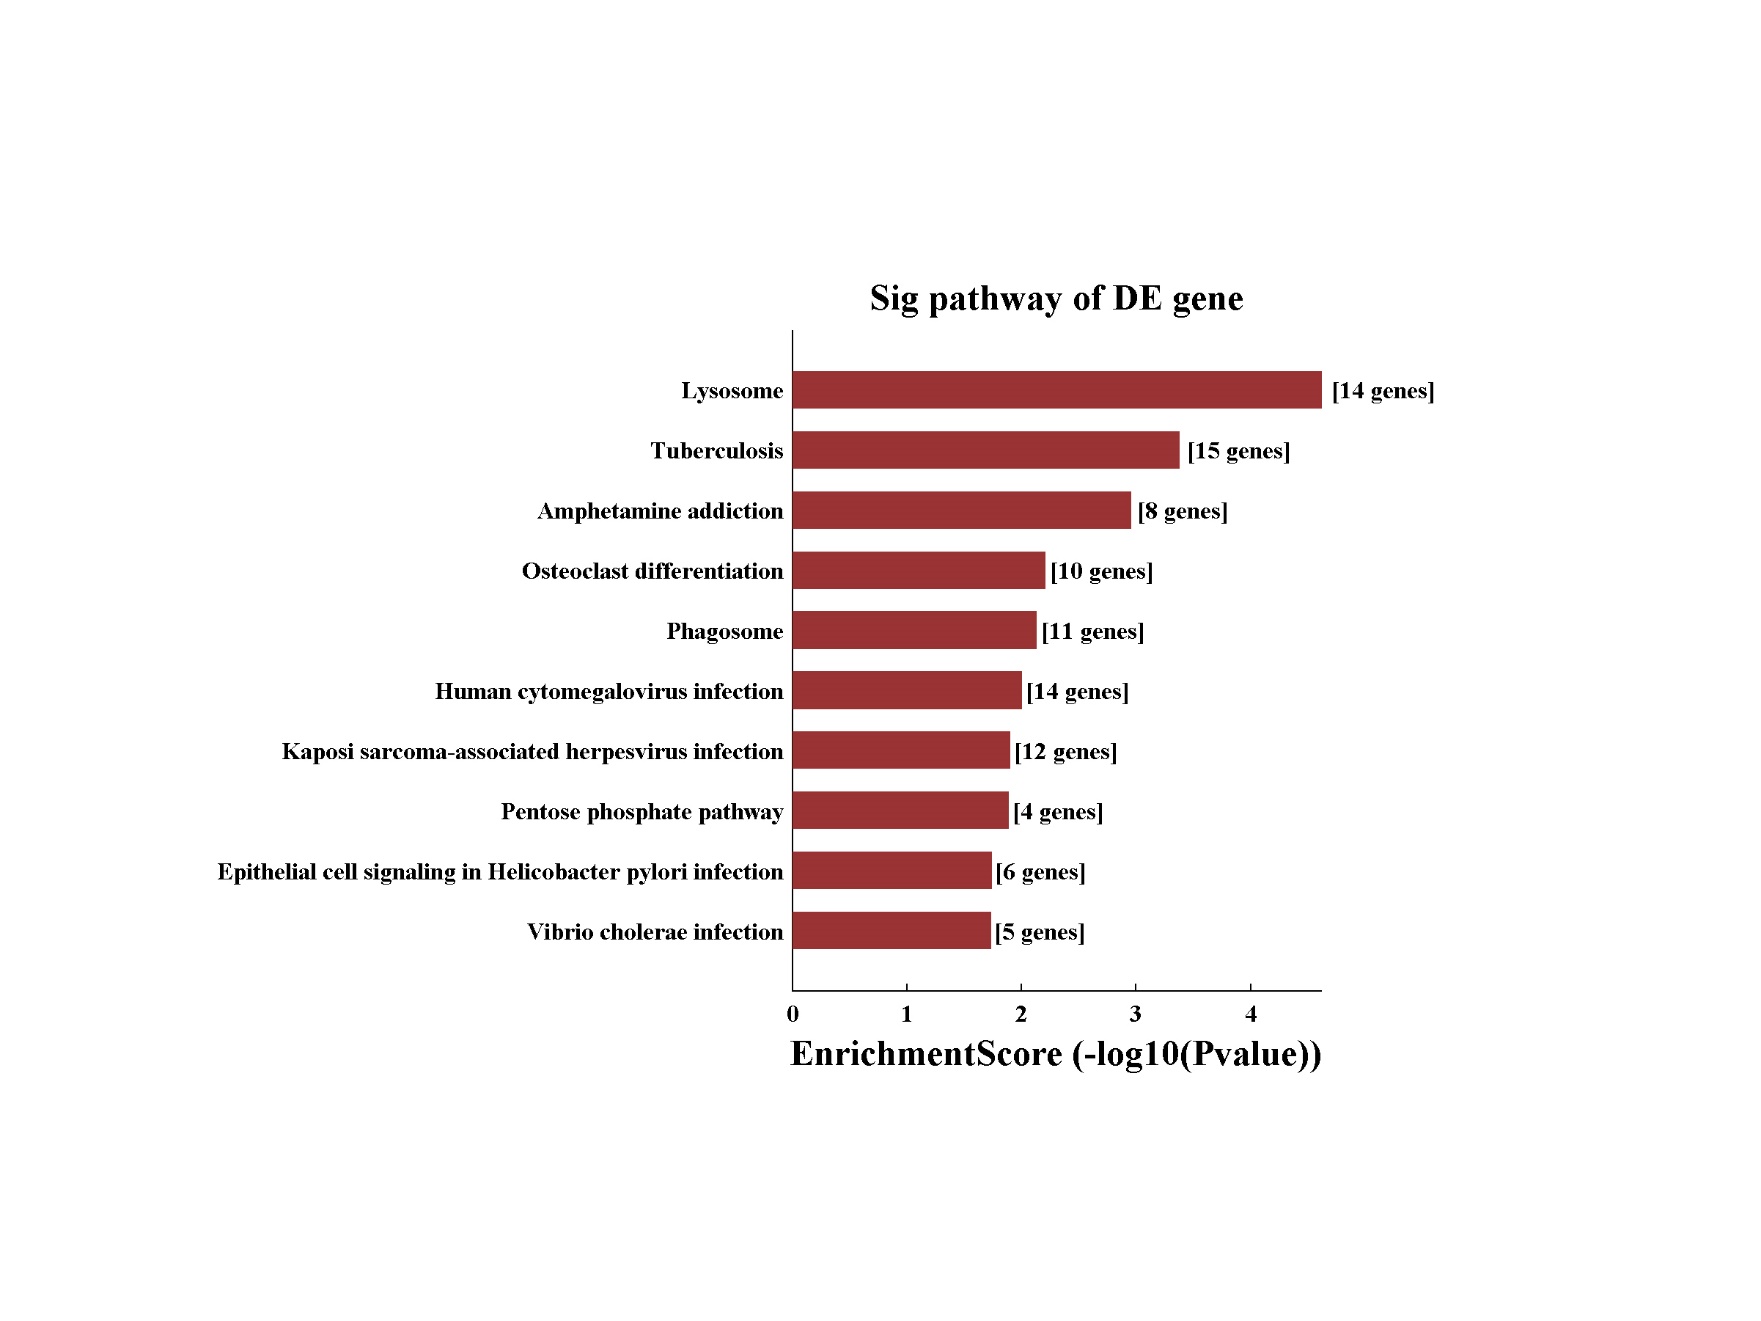


**Supplementary Figure 3** KEGG enrichment analyses of downregulated mRNAs.


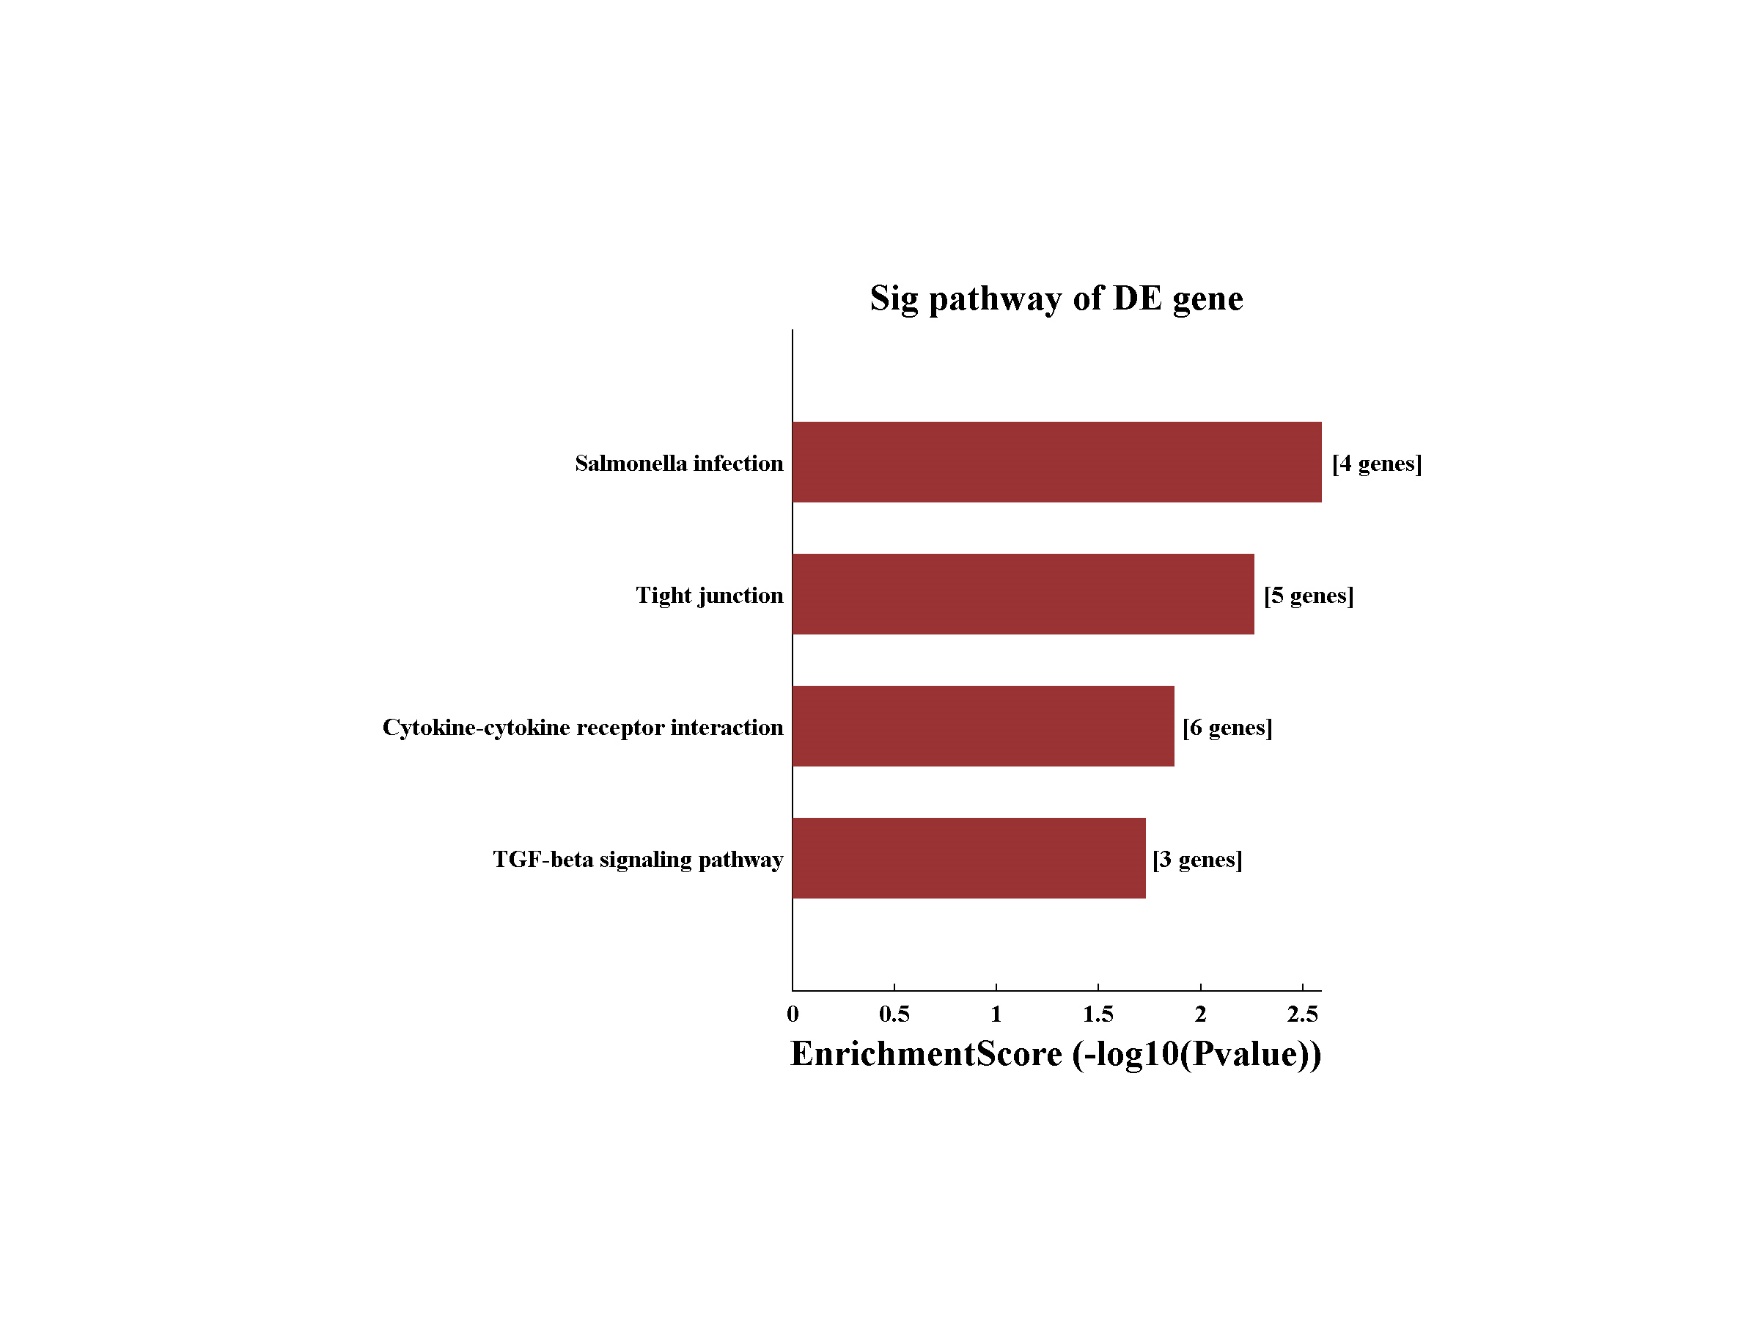

Supplement: Supplementary file 1 [file get_supplementary_file.php]
